# Supplementary material
Source: publisher figshare collection journal article supplement (https://tandf.figshare.com/articles/dataset/_/1232161)
Supplement: Supplementary file 2 [file 4]

**Supplementary table** The percentage of cells with different types of micronuclei with or without ion irradiation (IR) treatment in negative control (NC) or miR-214 overexpression groups

| SKOV3 cells                       |           |               |           |               |
|-----------------------------------|-----------|---------------|-----------|---------------|
| Cell type                         | NC (-IR)  | miR-214 (-IR) | NC (+IR)  | miR-214 (+IR) |
| Without micronuclei               | 88.3± 1.8 | 86.2± 0.9     | 81.7± 2.0 | 68.8± 1.6     |
| With centromeric micronuclei      | 2.7± 1.5  | 2.4± 0.5      | 2.4± 1.0  | 1.5± 0.7      |
| With non -centromeric micronuclei | 8± 0.5    | 9.8± 0.2      | 14.5± 2.6 | 28.3± 0.6     |
| With both micronuclei             | 1± 0.1    | 1.5± 0.2      | 1.4± 0.4  | 1.5± 1.4      |
| A2780 cells                       |           |               |           |               |
| Cell type                         | NC (-IR)  | miR-214 (-IR) | NC (+IR)  | miR-214 (+IR) |
| Without micronuclei               | 91.9± 0.9 | 92.4± 2.6     | 84.9± 2.0 | 68.8± 0.9     |
| With centromeric micronuclei      | 2.9± 1.2  | 3.2± 0.1      | 2.4± 1.1  | 0.8± 0.4      |
| With non -centromeric micronuclei | 4.9± 2.6  | 4.1± 2.3      | 16.7± 4.7 | 27.9± 2.7     |
| With both micronuclei             | 0.4± 0.5  | 0.3± 0.4      | 1.9± 0.4  | 2.5± 1.3      |

Mean ± SD, from two independent experiments.
