# Supplementary material
Source: publisher figshare collection journal article supplement (https://tandf.figshare.com/articles/dataset/_/1232161)

Figure S1

A Only miR-214 can be predicted by three softwares

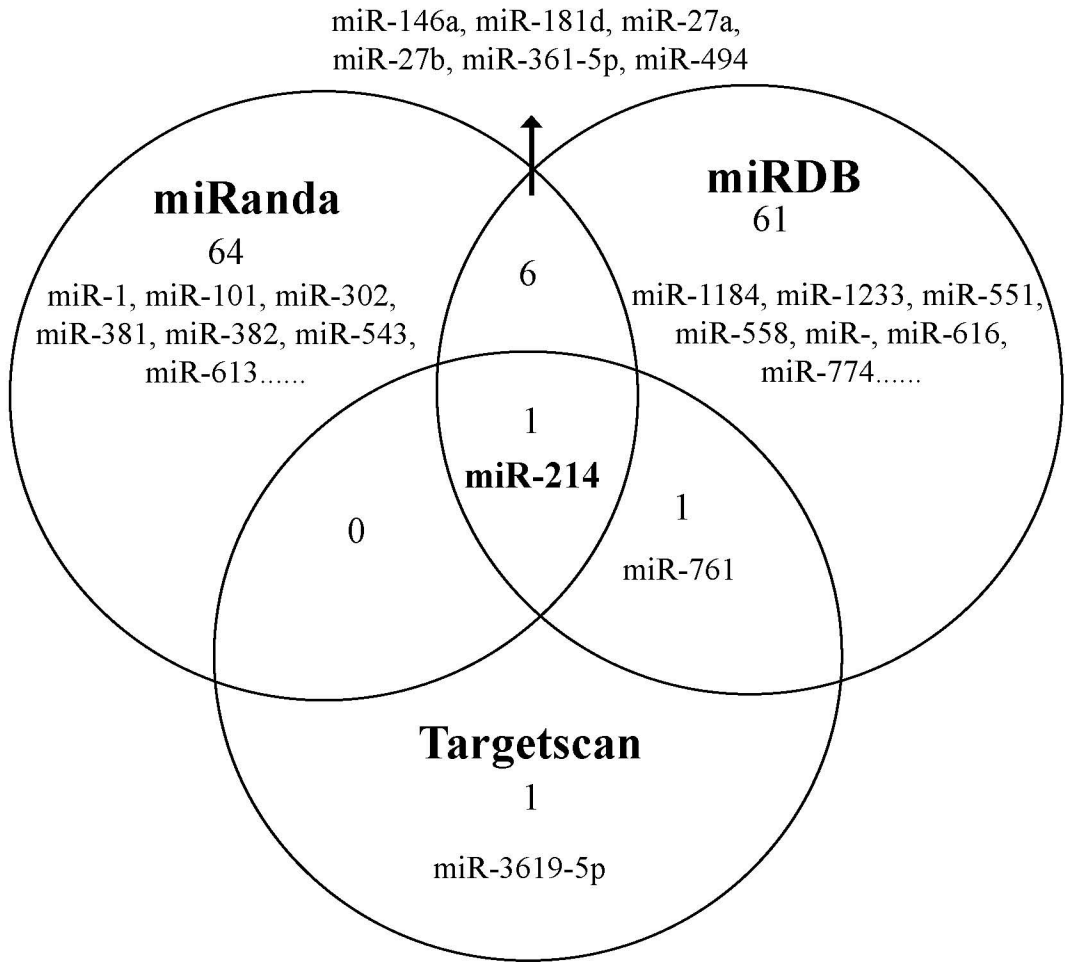

B The conserved miR-214 binding sites in 3' UTR of RNF8 mRNA

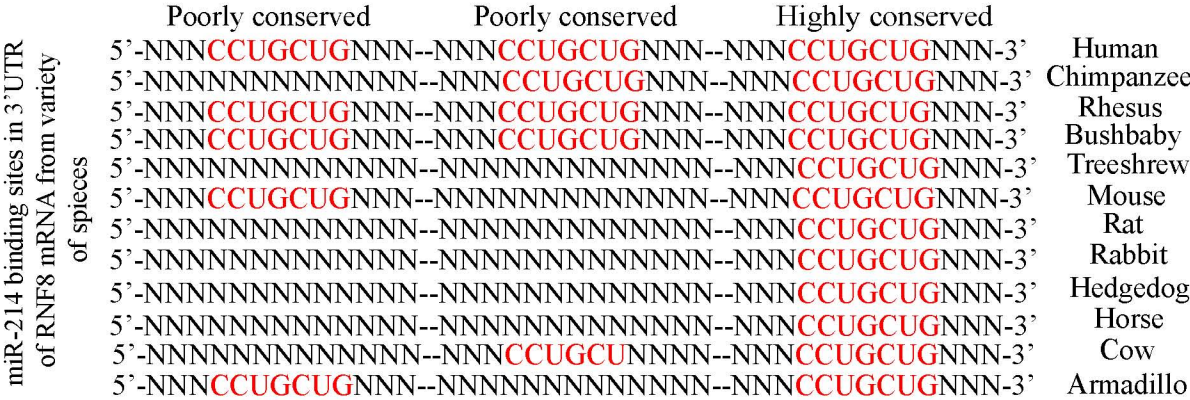

Supplement: Supplementary file 3 [file 4]
