# Supplementary material
Source: publisher figshare collection journal article supplement (https://tandf.figshare.com/articles/dataset/_/1232161)

Figure S6

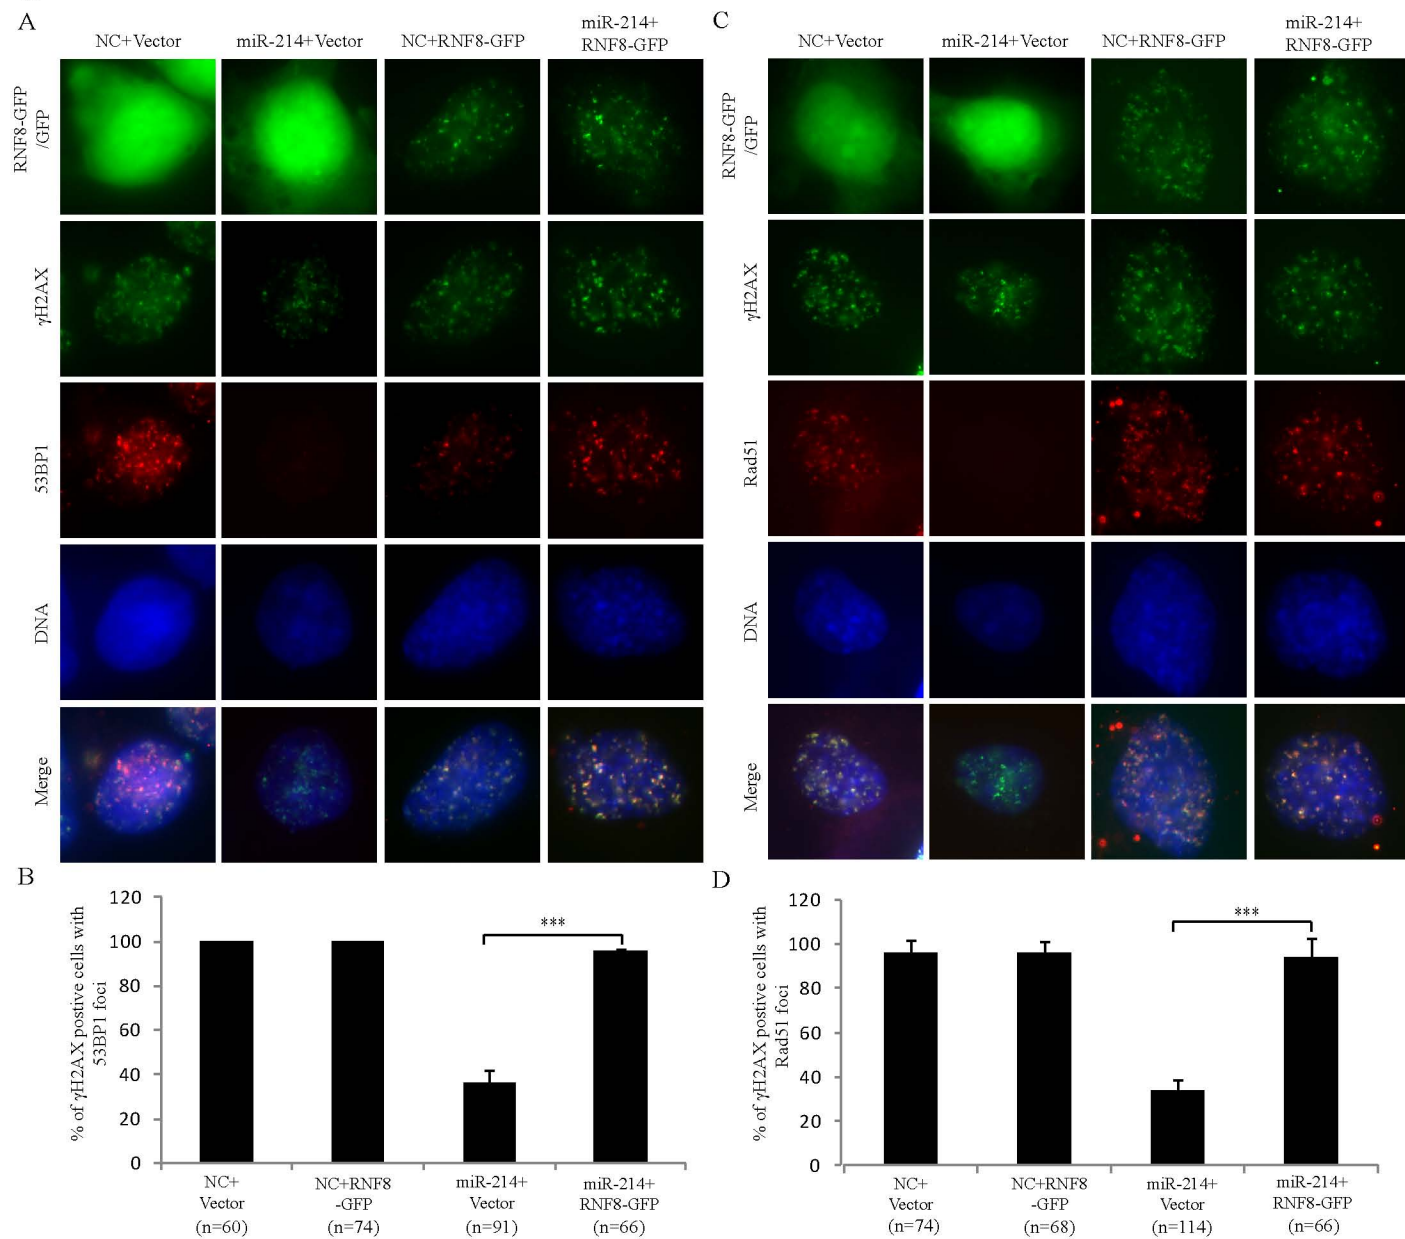

Supplement: Supplementary file 1 [file 4]

Figure S5

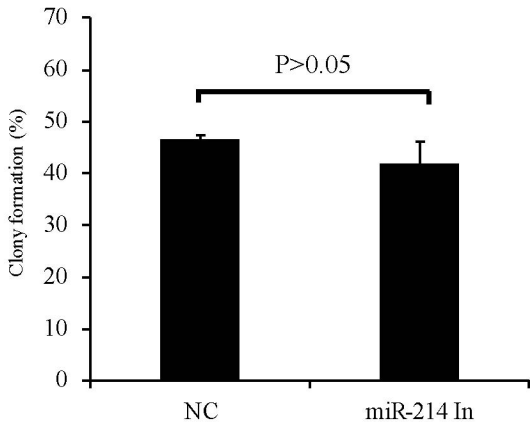

Supplement: Supplementary file 4 [file 4]

Figure S4

A

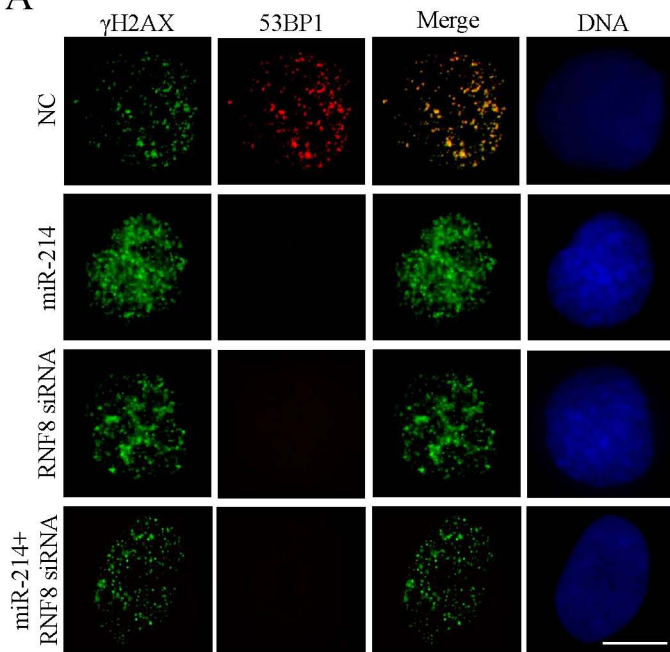

B

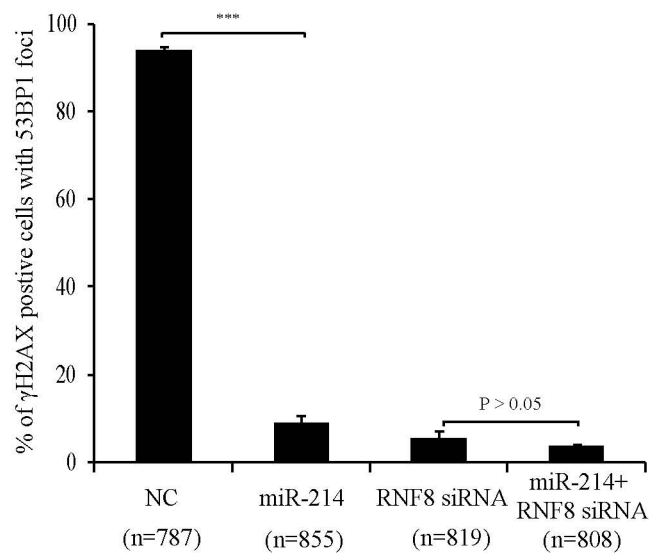

C

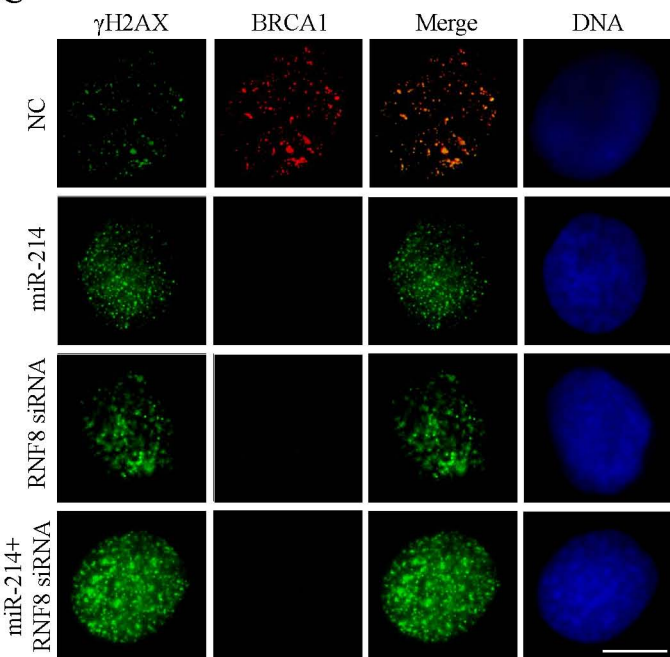

D

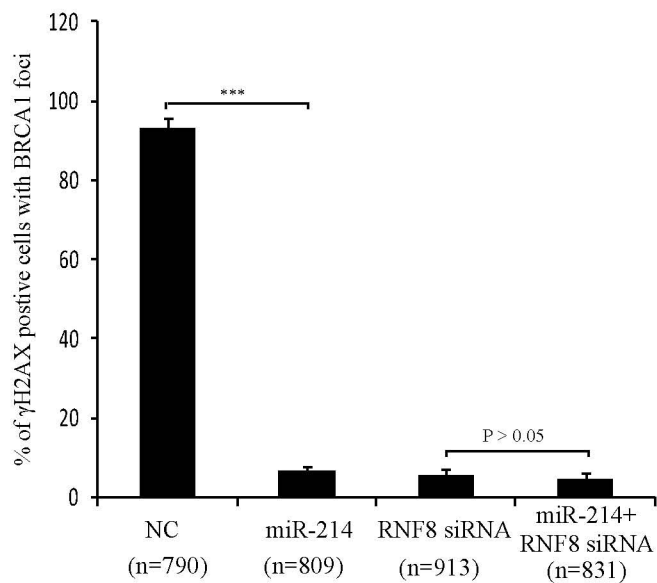

Supplement: Supplementary file 5 [file 4]

Figure S2

miR-214 expression is negatively correlated with RNF8 mRNA in grade 1 and 2 ovarian cancer

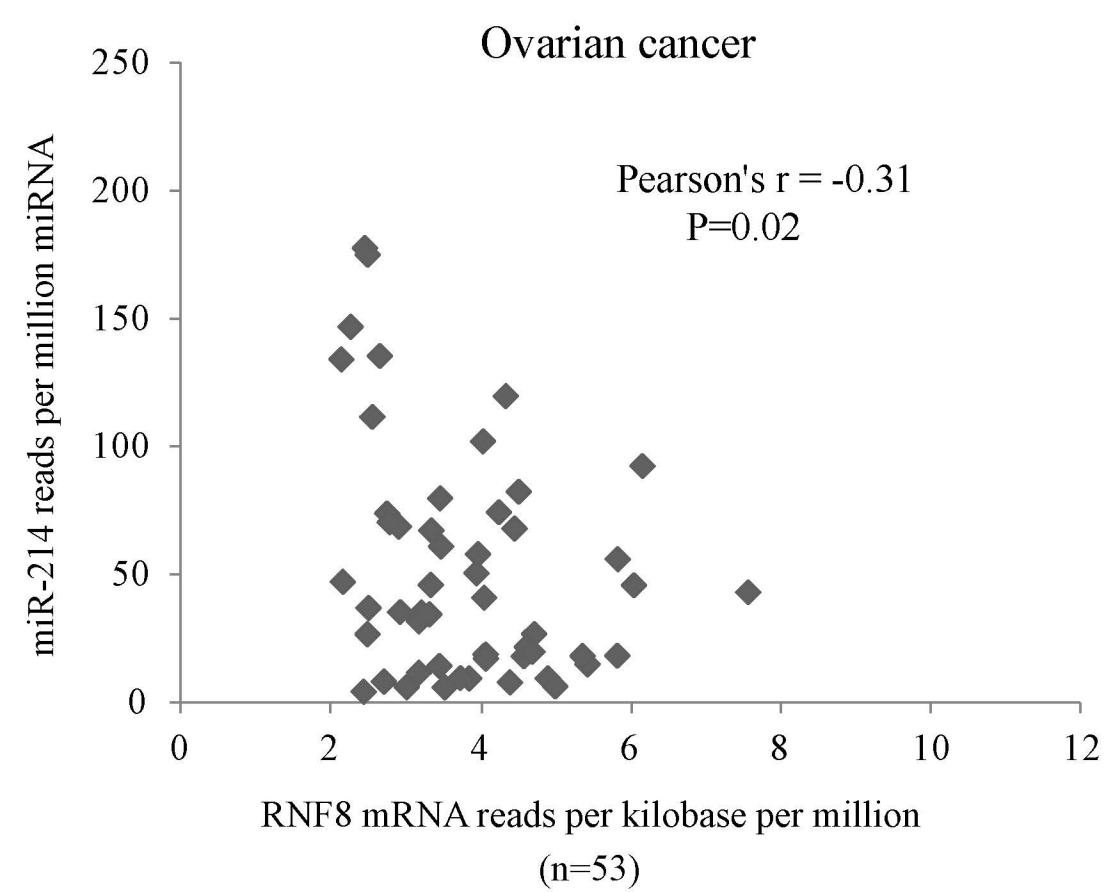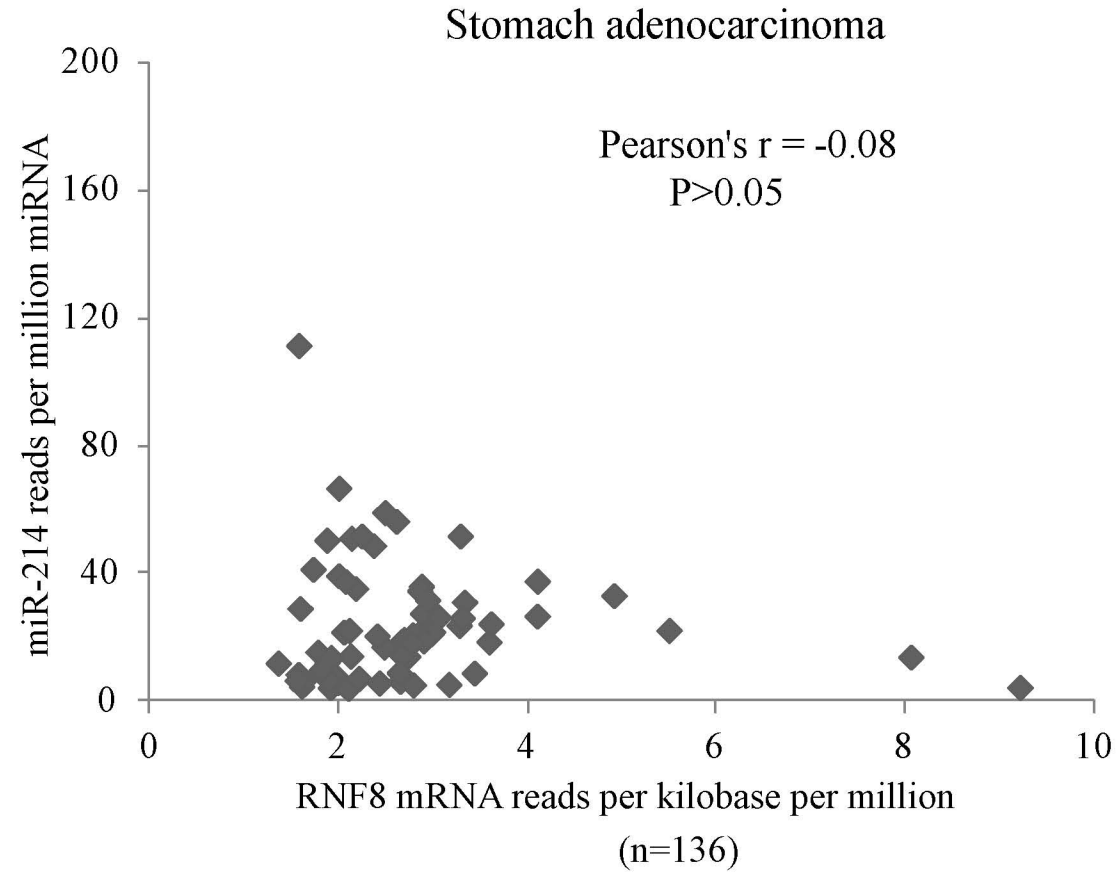

Supplement: Supplementary file 6 [file 4]

Figure S3

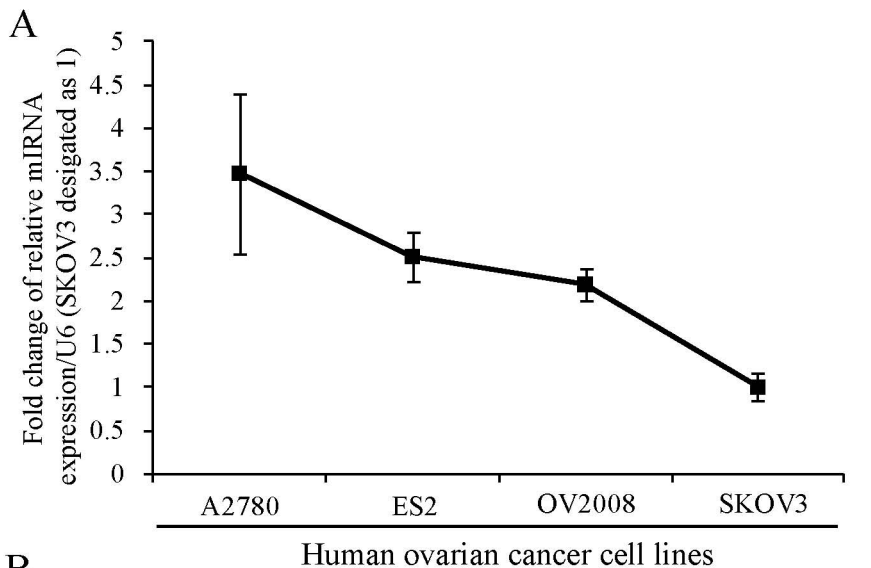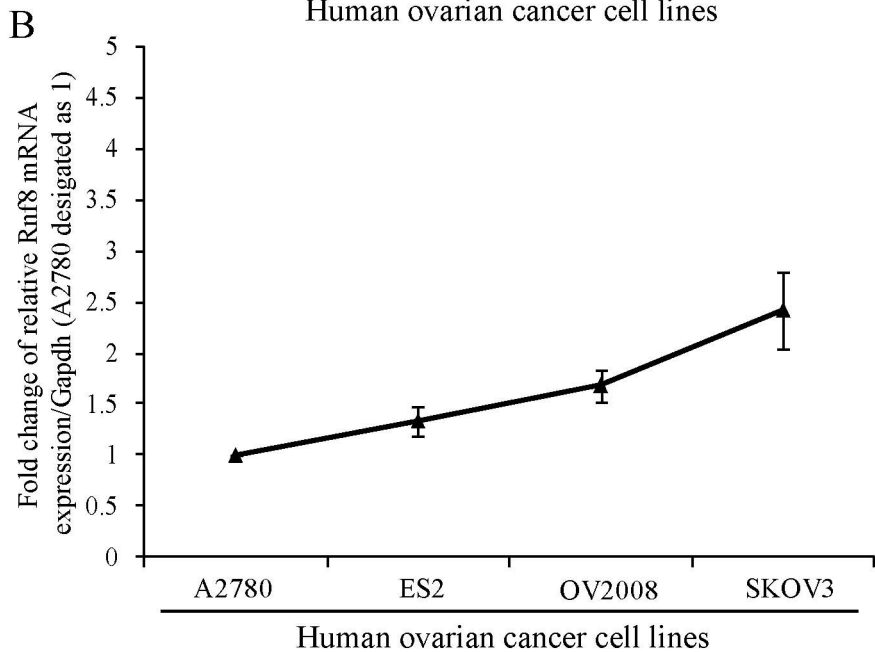

Supplement: Supplementary file 7 [file 4]
